# Supplementary material for: How the scientific community responded to the COVID-19 pandemic: A subject-level time-trend bibliometric analysis
Source: PubMed Central journal article supplement (PMC8483337; doi:10.1371/journal.pone.0258064), 2021-09-30
Supplement: pone.0258064.s003.pdf [file pone.0258064.s003.pdf]

### Supplementary Table 3

|                      | Publication<br>Count | Publication<br>Share | Citation<br>Count | Citation<br>Share |
|----------------------|----------------------|----------------------|-------------------|-------------------|
| United States        | 44,879               | 28.20%               | 376,897           | 31.26%            |
| China                | 16,485               | 10.36%               | 411,151           | 34.10%            |
| United Kingdom       | 15,691               | 9.86%                | 154,236           | 12.79%            |
| Italy                | 13,510               | 8.49%                | 126,656           | 10.50%            |
| India                | 11,846               | 7.44%                | 45,356            | 3.76%             |
| Canada               | 6,428                | 4.04%                | 54,622            | 4.53%             |
| Spain                | 6,292                | 3.95%                | 43,511            | 3.61%             |
| Australia            | 5,655                | 3.55%                | 53,556            | 4.44%             |
| France               | 5,505                | 3.46%                | 63,557            | 5.27%             |
| Germany              | 5,461                | 3.43%                | 69,720            | 5.78%             |
| Brazil               | 4,636                | 2.91%                | 22,635            | 1.88%             |
| Iran                 | 4,142                | 2.60%                | 20,598            | 1.71%             |
| Turkey               | 3,377                | 2.12%                | 13,287            | 1.10%             |
| Switzerland          | 2,834                | 1.78%                | 36,460            | 3.02%             |
| Saudi Arabia         | 2,809                | 1.77%                | 15,421            | 1.28%             |
| Japan                | 2,794                | 1.76%                | 22,549            | 1.87%             |
| Netherlands          | 2,654                | 1.67%                | 38,399            | 3.18%             |
| South Africa         | 2,058                | 1.29%                | 9,280             | 0.77%             |
| Pakistan             | 1,999                | 1.26%                | 9,391             | 0.78%             |
| South Korea          | 1,958                | 1.23%                | 18,069            | 1.50%             |
| Belgium              | 1,924                | 1.21%                | 18,727            | 1.55%             |
| Singapore            | 1,912                | 1.20%                | 28,295            | 2.35%             |
| Sweden               | 1,591                | 1.00%                | 16,833            | 1.40%             |
| Poland               | 1,560                | 0.98%                | 8,374             | 0.69%             |
| Egypt                | 1,550                | 0.97%                | 6,585             | 0.55%             |
| Israel               | 1,461                | 0.92%                | 9,939             | 0.82%             |
| Malaysia             | 1,389                | 0.87%                | 4,867             | 0.40%             |
| Ireland              | 1,365                | 0.86%                | 9,040             | 0.75%             |
| Greece               | 1,356                | 0.85%                | 14,984            | 1.24%             |
| Mexico               | 1,298                | 0.82%                | 7,287             | 0.60%             |
| Taiwan               | 1,276                | 0.80%                | 11,111            | 0.92%             |
| Portugal             | 1,257                | 0.79%                | 6,286             | 0.52%             |
| Indonesia            | 1,246                | 0.78%                | 5,151             | 0.43%             |
| Austria              | 1,185                | 0.74%                | 16,089            | 1.33%             |
| Denmark              | 1,105                | 0.69%                | 14,159            | 1.17%             |
| Nigeria              | 1,034                | 0.65%                | 3,062             | 0.25%             |
| Bangladesh           | 1,034                | 0.65%                | 5,646             | 0.47%             |
| Russian Federation   | 937                  | 0.59%                | 12,984            | 1.08%             |
| Norway               | 849                  | 0.53%                | 7,709             | 0.64%             |
| New Zealand          | 841                  | 0.53%                | 6,897             | 0.57%             |
| United Arab Emirates | 819                  | 0.51%                | 4,219             | 0.35%             |
| Thailand             | 792                  | 0.50%                | 5,276             | 0.44%             |
| Colombia             | 780                  | 0.49%                | 5,478             | 0.45%             |

### Supplementary Table 3

|                | Publication Count | Publication Share | Citation Count | Citation Share |
|----------------|-------------------|-------------------|----------------|----------------|
| Romania        | 635               | 0.40%             | 2,965          | 0.25%          |
| Argentina      | 631               | 0.40%             | 3,821          | 0.32%          |
| Chile          | 627               | 0.39%             | 2,776          | 0.23%          |
| Finland        | 601               | 0.38%             | 4,779          | 0.40%          |
| Jordan         | 583               | 0.37%             | 2,331          | 0.19%          |
| Qatar          | 553               | 0.35%             | 2,350          | 0.19%          |
| Vietnam        | 549               | 0.34%             | 7,019          | 0.58%          |
| Philippines    | 536               | 0.34%             | 1,688          | 0.14%          |
| Peru           | 509               | 0.32%             | 3,181          | 0.26%          |
| Morocco        | 496               | 0.31%             | 1,544          | 0.13%          |
| Ethiopia       | 471               | 0.30%             | 1,170          | 0.10%          |
| Lebanon        | 463               | 0.29%             | 2,467          | 0.20%          |
| Czech Republic | 447               | 0.28%             | 2,487          | 0.21%          |
| Nepal          | 432               | 0.27%             | 2,972          | 0.25%          |
| Iraq           | 412               | 0.26%             | 1,530          | 0.13%          |
| Croatia        | 358               | 0.22%             | 2,197          | 0.18%          |
| Kenya          | 347               | 0.22%             | 1,033          | 0.09%          |
| Ghana          | 320               | 0.20%             | 804            | 0.07%          |
| Hungary        | 319               | 0.20%             | 2,648          | 0.22%          |
| Serbia         | 290               | 0.18%             | 801            | 0.07%          |
| Venezuela      | 282               | 0.18%             | 2,004          | 0.17%          |
| Slovenia       | 273               | 0.17%             | 1,839          | 0.15%          |
| Oman           | 273               | 0.17%             | 2,634          | 0.22%          |
| Ecuador        | 270               | 0.17%             | 1,679          | 0.14%          |
| Cyprus         | 239               | 0.15%             | 1,211          | 0.10%          |
| Tunisia        | 232               | 0.15%             | 1,156          | 0.10%          |
| Georgia        | 228               | 0.14%             | 661            | 0.05%          |
| Kuwait         | 226               | 0.14%             | 1,487          | 0.12%          |
| Ukraine        | 221               | 0.14%             | 797            | 0.07%          |
| Uganda         | 218               | 0.14%             | 776            | 0.06%          |
| Slovakia       | 161               | 0.10%             | 469            | 0.04%          |
| Cameroon       | 160               | 0.10%             | 714            | 0.06%          |
| Sri Lanka      | 146               | 0.09%             | 796            | 0.07%          |
| Algeria        | 141               | 0.09%             | 383            | 0.03%          |
| Sudan          | 139               | 0.09%             | 619            | 0.05%          |
| Lithuania      | 132               | 0.08%             | 945            | 0.08%          |
| Uruguay        | 131               | 0.08%             | 424            | 0.04%          |
| Bulgaria       | 129               | 0.08%             | 601            | 0.05%          |
| Kazakhstan     | 119               | 0.07%             | 400            | 0.03%          |
| Tanzania       | 118               | 0.07%             | 539            | 0.04%          |
| Malta          | 113               | 0.07%             | 381            | 0.03%          |
| Luxembourg     | 112               | 0.07%             | 737            | 0.06%          |
| Bahrain        | 110               | 0.07%             | 252            | 0.02%          |

### Supplementary Table 3

|                                  | Publication Count | Publication Share | Citation Count | Citation Share |
|----------------------------------|-------------------|-------------------|----------------|----------------|
| Zimbabwe                         | 103               | 0.06%             | 418            | 0.03%          |
| Cuba                             | 101               | 0.06%             | 148            | 0.01%          |
| Palestine                        | 99                | 0.06%             | 207            | 0.02%          |
| Estonia                          | 94                | 0.06%             | 1,151          | 0.10%          |
| Senegal                          | 91                | 0.06%             | 923            | 0.08%          |
| Democratic Republic Of The Congo | 87                | 0.05%             | 300            | 0.02%          |
| Yemen                            | 86                | 0.05%             | 295            | 0.02%          |
| Bosnia And Herzegovina           | 86                | 0.05%             | 143            | 0.01%          |
| Zambia                           | 79                | 0.05%             | 270            | 0.02%          |
| Malawi                           | 75                | 0.05%             | 265            | 0.02%          |
| Libya                            | 73                | 0.05%             | 153            | 0.01%          |
| Jamaica                          | 73                | 0.05%             | 185            | 0.02%          |
| Bolivia                          | 68                | 0.04%             | 1,220          | 0.10%          |
| Mozambique                       | 65                | 0.04%             | 926            | 0.08%          |
| Costa Rica                       | 64                | 0.04%             | 232            | 0.02%          |
| Panama                           | 60                | 0.04%             | 1,063          | 0.09%          |
| Brunei Darussalam                | 56                | 0.04%             | 482            | 0.04%          |
| Rwanda                           | 55                | 0.03%             | 159            | 0.01%          |
| North Macedonia                  | 53                | 0.03%             | 539            | 0.04%          |
| Afghanistan                      | 53                | 0.03%             | 107            | 0.01%          |
| Albania                          | 52                | 0.03%             | 236            | 0.02%          |
| Nicaragua                        | 48                | 0.03%             | 69             | 0.01%          |
| Latvia                           | 44                | 0.03%             | 95             | 0.01%          |
| Honduras                         | 44                | 0.03%             | 1,353          | 0.11%          |
| Paraguay                         | 43                | 0.03%             | 716            | 0.06%          |
| Puerto Rico                      | 42                | 0.03%             | 368            | 0.03%          |
| Syria                            | 40                | 0.03%             | 68             | 0.01%          |
| Mali                             | 40                | 0.03%             | 429            | 0.04%          |
| Congo                            | 39                | 0.02%             | 1,279          | 0.11%          |
| Botswana                         | 39                | 0.02%             | 119            | 0.01%          |
| Iceland                          | 38                | 0.02%             | 555            | 0.05%          |
| Fiji                             | 36                | 0.02%             | 93             | 0.01%          |
| Burkina Faso                     | 36                | 0.02%             | 49             | 0.00%          |
| Azerbaijan                       | 36                | 0.02%             | 195            | 0.02%          |
| Sierra Leone                     | 35                | 0.02%             | 59             | 0.00%          |
| Guatemala                        | 35                | 0.02%             | 157            | 0.01%          |
| Mauritius                        | 33                | 0.02%             | 384            | 0.03%          |
| Benin                            | 33                | 0.02%             | 93             | 0.01%          |
| Gabon                            | 31                | 0.02%             | 115            | 0.01%          |
| Dominican Republic               | 31                | 0.02%             | 68             | 0.01%          |
| Belarus                          | 31                | 0.02%             | 275            | 0.02%          |
| Uzbekistan                       | 30                | 0.02%             | 31             | 0.00%          |
| Trinidad And Tobago              | 28                | 0.02%             | 69             | 0.01%          |

### Supplementary Table 3

|                       | Publication Count | Publication Share | Citation Count | Citation Share |
|-----------------------|-------------------|-------------------|----------------|----------------|
| Myanmar               | 27                | 0.02%             | 49             | 0.00%          |
| Guinea                | 27                | 0.02%             | 117            | 0.01%          |
| Cambodia              | 27                | 0.02%             | 323            | 0.03%          |
| Armenia               | 27                | 0.02%             | 162            | 0.01%          |
| Madagascar            | 25                | 0.02%             | 58             | 0.00%          |
| Gambia                | 24                | 0.02%             | 116            | 0.01%          |
| Barbados              | 24                | 0.02%             | 29             | 0.00%          |
| Kyrgyzstan            | 22                | 0.01%             | 34             | 0.00%          |
| Montenegro            | 19                | 0.01%             | 23             | 0.00%          |
| Grenada               | 19                | 0.01%             | 54             | 0.00%          |
| Cote D'Ivoire         | 18                | 0.01%             | 386            | 0.03%          |
| Namibia               | 17                | 0.01%             | 48             | 0.00%          |
| El Salvador           | 17                | 0.01%             | 37             | 0.00%          |
| Somalia               | 15                | 0.01%             | 61             | 0.01%          |
| Liechtenstein         | 15                | 0.01%             | 39             | 0.00%          |
| Bhutan                | 14                | 0.01%             | 22             | 0.00%          |
| Togo                  | 13                | 0.01%             | 26             | 0.00%          |
| Swaziland             | 13                | 0.01%             | 41             | 0.00%          |
| Papua New Guinea      | 13                | 0.01%             | 59             | 0.00%          |
| Niger                 | 13                | 0.01%             | 4              | 0.00%          |
| French Guiana         | 13                | 0.01%             | 101            | 0.01%          |
| Maldives              | 12                | 0.01%             | 161            | 0.01%          |
| Gibraltar             | 12                | 0.01%             | 9              | 0.00%          |
| Aruba                 | 12                | 0.01%             | 114            | 0.01%          |
| Saint Kitts And Nevis | 11                | 0.01%             | 4              | 0.00%          |
| Kosovo                | 11                | 0.01%             | 11             | 0.00%          |
| Haiti                 | 11                | 0.01%             | 19             | 0.00%          |
| Mongolia              | 10                | 0.01%             | 39             | 0.00%          |
| Martinique            | 10                | 0.01%             | 15             | 0.00%          |
| Liberia               | 10                | 0.01%             | 39             | 0.00%          |
| Guinea-Bissau         | 10                | 0.01%             | 111            | 0.01%          |
