# Supplementary material for: How the scientific community responded to the COVID-19 pandemic: A subject-level time-trend bibliometric analysis
Source: PubMed Central journal article supplement (PMC8483337; doi:10.1371/journal.pone.0258064), 2021-09-30
Supplement: pone.0258064.s004.pdf [file pone.0258064.s004.pdf]

## Supplementary Table 4

| Research Institute                             | Country        | State/Province | Publication Count |
|------------------------------------------------|----------------|----------------|-------------------|
| <b>Harvard Medical School</b>                  | United States  | Massachusetts  | 2458              |
| <b>University Of Toronto</b>                   | Canada         | Ontario        | 2227              |
| <b>Tongji Medical College</b>                  | China          | Hubei          | 2003              |
| <b>Wuhan University</b>                        | China          | Hubei          | 1787              |
| <b>University College London</b>               | United Kingdom | London         | 1656              |
| <b>University Of Oxford</b>                    | United Kingdom | Oxford         | 1603              |
| <b>Stanford University</b>                     | United States  | California     | 1363              |
| <b>University Of Washington</b>                | United States  | Washington     | 1334              |
| <b>Icahn School Of Medicine At Mount Sinai</b> | United States  | New York       | 1303              |
| <b>Mayo Clinic</b>                             | United States  | Minnesota      | 1290              |
| <b>University Of Milan</b>                     | Italy          | Milan          | 1253              |
| <b>Imperial College London</b>                 | United Kingdom | London         | 1141              |
| <b>King's College London</b>                   | United Kingdom | London         | 1067              |
| <b>Tehran University Of Medical Sciences</b>   | Iran           | Tehran         | 1023              |
| <b>Inserm</b>                                  | France         | Paris          | 997               |
| <b>The University Of Hong Kong</b>             | China          | Hong Kong      | 990               |
| <b>University Of Pennsylvania</b>              | United States  | Pennsylvania   | 983               |
| <b>University Of Health Sciences</b>           | Pakistan       | Lahore         | 979               |
| <b>Sapienza University of Rome</b>             | Italy          | Rome           | 964               |
| <b>University Of California, San Francisco</b> | United States  | California     | 954               |
