# Supplementary material for: How the scientific community responded to the COVID-19 pandemic: A subject-level time-trend bibliometric analysis
Source: PubMed Central journal article supplement (PMC8483337; doi:10.1371/journal.pone.0258064), 2021-09-30
Supplement: pone.0258064.s005.pdf [file pone.0258064.s005.pdf]

## Supplementary Table 5

|                        | Publication Count | Publication Share | Citation Count | Citation Share |
|------------------------|-------------------|-------------------|----------------|----------------|
| United Kingdom         | 15,691            | 27.69%            | 154,236        | 35.35%         |
| Italy                  | 13,510            | 23.84%            | 126,656        | 29.03%         |
| Spain                  | 6,292             | 11.10%            | 43,511         | 9.97%          |
| France                 | 5,505             | 9.71%             | 63,557         | 14.57%         |
| Germany                | 5,461             | 9.64%             | 69,720         | 15.98%         |
| Turkey                 | 3,377             | 5.96%             | 13,287         | 3.05%          |
| Switzerland            | 2,834             | 5.00%             | 36,460         | 8.36%          |
| Netherlands            | 2,654             | 4.68%             | 38,399         | 8.80%          |
| Belgium                | 1,924             | 3.40%             | 18,727         | 4.29%          |
| Sweden                 | 1,591             | 2.81%             | 16,833         | 3.86%          |
| Poland                 | 1,560             | 2.75%             | 8,374          | 1.92%          |
| Ireland                | 1,365             | 2.41%             | 9,040          | 2.07%          |
| Greece                 | 1,356             | 2.39%             | 14,984         | 3.43%          |
| Portugal               | 1,257             | 2.22%             | 6,286          | 1.44%          |
| Austria                | 1,185             | 2.09%             | 16,089         | 3.69%          |
| Denmark                | 1,105             | 1.95%             | 14,159         | 3.25%          |
| Russian Federation     | 937               | 1.65%             | 12,984         | 2.98%          |
| Norway                 | 849               | 1.50%             | 7,709          | 1.77%          |
| Romania                | 635               | 1.12%             | 2,965          | 0.68%          |
| Finland                | 601               | 1.06%             | 4,779          | 1.10%          |
| Czech Republic         | 447               | 0.79%             | 2,487          | 0.57%          |
| Croatia                | 358               | 0.63%             | 2,197          | 0.50%          |
| Hungary                | 319               | 0.56%             | 2,648          | 0.61%          |
| Serbia                 | 290               | 0.51%             | 801            | 0.18%          |
| Slovenia               | 273               | 0.48%             | 1,839          | 0.42%          |
| Cyprus                 | 239               | 0.42%             | 1,211          | 0.28%          |
| Georgia                | 228               | 0.40%             | 661            | 0.15%          |
| Ukraine                | 221               | 0.39%             | 797            | 0.18%          |
| Slovakia               | 161               | 0.28%             | 469            | 0.11%          |
| Lithuania              | 132               | 0.23%             | 945            | 0.22%          |
| Bulgaria               | 129               | 0.23%             | 601            | 0.14%          |
| Kazakhstan             | 119               | 0.21%             | 400            | 0.09%          |
| Luxembourg             | 112               | 0.20%             | 737            | 0.17%          |
| Estonia                | 94                | 0.17%             | 1,151          | 0.26%          |
| Bosnia And Herzegovina | 86                | 0.15%             | 143            | 0.03%          |
| North Macedonia        | 53                | 0.09%             | 539            | 0.12%          |
| Albania                | 52                | 0.09%             | 236            | 0.05%          |
| Latvia                 | 44                | 0.08%             | 95             | 0.02%          |
| Iceland                | 38                | 0.07%             | 555            | 0.13%          |
| Azerbaijan             | 36                | 0.06%             | 195            | 0.04%          |
| Belarus                | 31                | 0.05%             | 275            | 0.06%          |
| Uzbekistan             | 30                | 0.05%             | 31             | 0.01%          |
| Armenia                | 27                | 0.05%             | 162            | 0.04%          |
| Montenegro             | 19                | 0.03%             | 23             | 0.01%          |

Europe and Central Asia

## Supplementary Table 5

|                         |                   | Publication<br>Count | Publication<br>Share | Citation<br>Count | Citation<br>Share |
|-------------------------|-------------------|----------------------|----------------------|-------------------|-------------------|
| Europe and Central Asia | Liechtenstein     | 15                   | 0.03%                | 39                | 0.01%             |
|                         | Gibraltar         | 12                   | 0.02%                | 9                 | 0.00%             |
|                         | Kosovo            | 11                   | 0.02%                | 11                | 0.00%             |
|                         | Turkmenistan      | 9                    | 0.02%                | 39                | 0.01%             |
|                         | Monaco            | 8                    | 0.01%                | 22                | 0.01%             |
|                         | Greenland         | 7                    | 0.01%                | 1                 | 0.00%             |
|                         | Faroe Islands     | 7                    | 0.01%                | 119               | 0.03%             |
|                         | Moldova           | 6                    | 0.01%                | 15                | 0.00%             |
|                         | San Marino        | 5                    | 0.01%                | 83                | 0.02%             |
|                         | Andorra           | 5                    | 0.01%                | 20                | 0.00%             |
|                         | Tajikistan        | 2                    | 0.00%                | 4                 | 0.00%             |
| North America           | United States     | 44,879               | 91.13%               | 376,897           | 92.98%            |
|                         | Canada            | 6,428                | 13.05%               | 54,622            | 13.48%            |
|                         | Bermuda           | 6                    | 0.01%                | 26                | 0.01%             |
| East Asia and Pacific   | China             | 16,485               | 51.36%               | 411,151           | 80.09%            |
|                         | Australia         | 5,655                | 17.62%               | 53,556            | 10.43%            |
|                         | Japan             | 2,794                | 8.70%                | 22,549            | 4.39%             |
|                         | South Korea       | 1,958                | 6.10%                | 18,069            | 3.52%             |
|                         | Singapore         | 1,912                | 5.96%                | 28,295            | 5.51%             |
|                         | Malaysia          | 1,389                | 4.33%                | 4,867             | 0.95%             |
|                         | Taiwan            | 1,276                | 3.98%                | 11,111            | 2.16%             |
|                         | Indonesia         | 1,246                | 3.88%                | 5,151             | 1.00%             |
|                         | New Zealand       | 841                  | 2.62%                | 6,897             | 1.34%             |
|                         | Thailand          | 792                  | 2.47%                | 5,276             | 1.03%             |
|                         | Vietnam           | 549                  | 1.71%                | 7,019             | 1.37%             |
|                         | Philippines       | 536                  | 1.67%                | 1,688             | 0.33%             |
|                         | Brunei Darussalam | 56                   | 0.17%                | 482               | 0.09%             |
|                         | Fiji              | 36                   | 0.11%                | 93                | 0.02%             |
|                         | Myanmar           | 27                   | 0.08%                | 49                | 0.01%             |
|                         | Cambodia          | 27                   | 0.08%                | 323               | 0.06%             |
|                         | Papua New Guinea  | 13                   | 0.04%                | 59                | 0.01%             |
|                         | Mongolia          | 10                   | 0.03%                | 39                | 0.01%             |
|                         | Samoa             | 9                    | 0.03%                | 9                 | 0.00%             |
|                         | Solomon Islands   | 5                    | 0.02%                | 21                | 0.00%             |
|                         | New Caledonia     | 5                    | 0.02%                | 8                 | 0.00%             |
|                         | Vanuatu           | 4                    | 0.01%                | 7                 | 0.00%             |
|                         | French Polynesia  | 4                    | 0.01%                | 2                 | 0.00%             |
| Tonga                   | 3                 | 0.01%                | 0                    | 0.00%             |                   |
| Timor-Leste             | 3                 | 0.01%                | 2                    | 0.00%             |                   |
| Guam                    | 2                 | 0.01%                | 11                   | 0.00%             |                   |
| South Asia              | India             | 11,846               | 78.77%               | 45,356            | 76.37%            |
|                         | Pakistan          | 1,999                | 13.29%               | 9,391             | 15.81%            |
|                         | Bangladesh        | 1,034                | 6.88%                | 5,646             | 9.51%             |
|                         | Nepal             | 432                  | 2.87%                | 2,972             | 5.00%             |

## Supplementary Table 5

|                              |                                  | Publication<br>Count | Publication<br>Share | Citation<br>Count | Citation<br>Share |
|------------------------------|----------------------------------|----------------------|----------------------|-------------------|-------------------|
| South Asia                   | Sri Lanka                        | 146                  | 0.97%                | 796               | 1.34%             |
|                              | Afghanistan                      | 53                   | 0.35%                | 107               | 0.18%             |
|                              | Bhutan                           | 14                   | 0.09%                | 22                | 0.04%             |
|                              | Maldives                         | 12                   | 0.08%                | 161               | 0.27%             |
| Middle East and North Africa | Iran                             | 4,142                | 31.81%               | 20,598            | 33.37%            |
|                              | Saudi Arabia                     | 2,809                | 21.57%               | 15,421            | 24.98%            |
|                              | Egypt                            | 1,550                | 11.90%               | 6,585             | 10.67%            |
|                              | Israel                           | 1,461                | 11.22%               | 9,939             | 16.10%            |
|                              | United Arab Emirates             | 819                  | 6.29%                | 4,219             | 6.84%             |
|                              | Jordan                           | 583                  | 4.48%                | 2,331             | 3.78%             |
|                              | Qatar                            | 553                  | 4.25%                | 2,350             | 3.81%             |
|                              | Morocco                          | 496                  | 3.81%                | 1,544             | 2.50%             |
|                              | Lebanon                          | 463                  | 3.56%                | 2,467             | 4.00%             |
|                              | Iraq                             | 412                  | 3.16%                | 1,530             | 2.48%             |
|                              | Oman                             | 273                  | 2.10%                | 2,634             | 4.27%             |
|                              | Tunisia                          | 232                  | 1.78%                | 1,156             | 1.87%             |
|                              | Kuwait                           | 226                  | 1.74%                | 1,487             | 2.41%             |
|                              | Algeria                          | 141                  | 1.08%                | 383               | 0.62%             |
|                              | Malta                            | 113                  | 0.87%                | 381               | 0.62%             |
|                              | Bahrain                          | 110                  | 0.84%                | 252               | 0.41%             |
|                              | Palestine                        | 99                   | 0.76%                | 207               | 0.34%             |
|                              | Yemen                            | 86                   | 0.66%                | 295               | 0.48%             |
|                              | Libya                            | 73                   | 0.56%                | 153               | 0.25%             |
|                              | Syria                            | 40                   | 0.31%                | 68                | 0.11%             |
| Djibouti                     | 3                                | 0.02%                | 3                    | 0.00%             |                   |
| Sub-Saharan Africa           | South Africa                     | 2,058                | 41.96%               | 9,280             | 46.86%            |
|                              | Nigeria                          | 1,034                | 21.08%               | 3,062             | 15.46%            |
|                              | Ethiopia                         | 471                  | 9.60%                | 1,170             | 5.91%             |
|                              | Kenya                            | 347                  | 7.07%                | 1,033             | 5.22%             |
|                              | Ghana                            | 320                  | 6.52%                | 804               | 4.06%             |
|                              | Uganda                           | 218                  | 4.44%                | 776               | 3.92%             |
|                              | Cameroon                         | 160                  | 3.26%                | 714               | 3.61%             |
|                              | Sudan                            | 139                  | 2.83%                | 619               | 3.13%             |
|                              | Tanzania                         | 118                  | 2.41%                | 539               | 2.72%             |
|                              | Zimbabwe                         | 103                  | 2.10%                | 418               | 2.11%             |
|                              | Senegal                          | 91                   | 1.86%                | 923               | 4.66%             |
|                              | Democratic Republic Of The Congo | 87                   | 1.77%                | 300               | 1.51%             |
|                              | Zambia                           | 79                   | 1.61%                | 270               | 1.36%             |
|                              | Malawi                           | 75                   | 1.53%                | 265               | 1.34%             |
|                              | Mozambique                       | 65                   | 1.33%                | 926               | 4.68%             |
|                              | Rwanda                           | 55                   | 1.12%                | 159               | 0.80%             |
|                              | Mali                             | 40                   | 0.82%                | 429               | 2.17%             |
|                              | Congo                            | 39                   | 0.80%                | 1,279             | 6.46%             |
|                              | Botswana                         | 39                   | 0.80%                | 119               | 0.60%             |

## Supplementary Table 5

|                             |                          | Publication<br>Count | Publication<br>Share | Citation<br>Count | Citation<br>Share |
|-----------------------------|--------------------------|----------------------|----------------------|-------------------|-------------------|
| Sub-Saharan Africa          | Burkina Faso             | 36                   | 0.73%                | 49                | 0.25%             |
|                             | Sierra Leone             | 35                   | 0.71%                | 59                | 0.30%             |
|                             | Mauritius                | 33                   | 0.67%                | 384               | 1.94%             |
|                             | Benin                    | 33                   | 0.67%                | 93                | 0.47%             |
|                             | Gabon                    | 31                   | 0.63%                | 115               | 0.58%             |
|                             | Guinea                   | 27                   | 0.55%                | 117               | 0.59%             |
|                             | Madagascar               | 25                   | 0.51%                | 58                | 0.29%             |
|                             | Cote D'Ivoire            | 18                   | 0.37%                | 386               | 1.95%             |
|                             | Namibia                  | 17                   | 0.35%                | 48                | 0.24%             |
|                             | Somalia                  | 15                   | 0.31%                | 61                | 0.31%             |
|                             | Togo                     | 13                   | 0.27%                | 26                | 0.13%             |
|                             | Niger                    | 13                   | 0.27%                | 4                 | 0.02%             |
|                             | Liberia                  | 10                   | 0.20%                | 39                | 0.20%             |
|                             | Guinea-Bissau            | 10                   | 0.20%                | 111               | 0.56%             |
|                             | Lesotho                  | 9                    | 0.18%                | 42                | 0.21%             |
|                             | Mauritania               | 6                    | 0.12%                | 12                | 0.06%             |
|                             | Eritrea                  | 6                    | 0.12%                | 13                | 0.07%             |
|                             | Burundi                  | 6                    | 0.12%                | 3                 | 0.02%             |
|                             | Chad                     | 5                    | 0.10%                | 5                 | 0.03%             |
|                             | Central African Republic | 4                    | 0.08%                | 53                | 0.27%             |
| Seychelles                  | 3                        | 0.06%                | 5                    | 0.03%             |                   |
| Angola                      | 3                        | 0.06%                | 0                    | 0.00%             |                   |
| Equatorial Guinea           | 1                        | 0.02%                | 2                    | 0.01%             |                   |
| Comoros                     | 1                        | 0.02%                | 3                    | 0.02%             |                   |
| Latin America and Caribbean | Brazil                   | 4,636                | 53.66%               | 22,635            | 55.48%            |
|                             | Mexico                   | 1,298                | 15.02%               | 7,287             | 17.86%            |
|                             | Colombia                 | 780                  | 9.03%                | 5,478             | 13.43%            |
|                             | Argentina                | 631                  | 7.30%                | 3,821             | 9.36%             |
|                             | Chile                    | 627                  | 7.26%                | 2,776             | 6.80%             |
|                             | Peru                     | 509                  | 5.89%                | 3,181             | 7.80%             |
|                             | Venezuela                | 282                  | 3.26%                | 2,004             | 4.91%             |
|                             | Ecuador                  | 270                  | 3.13%                | 1,679             | 4.12%             |
|                             | Uruguay                  | 131                  | 1.52%                | 424               | 1.04%             |
|                             | Cuba                     | 101                  | 1.17%                | 148               | 0.36%             |
|                             | Jamaica                  | 73                   | 0.85%                | 185               | 0.45%             |
|                             | Bolivia                  | 68                   | 0.79%                | 1,220             | 2.99%             |
|                             | Costa Rica               | 64                   | 0.74%                | 232               | 0.57%             |
|                             | Panama                   | 60                   | 0.69%                | 1,063             | 2.61%             |
|                             | Nicaragua                | 48                   | 0.56%                | 69                | 0.17%             |
|                             | Honduras                 | 44                   | 0.51%                | 1,353             | 3.32%             |
|                             | Paraguay                 | 43                   | 0.50%                | 716               | 1.75%             |
|                             | Puerto Rico              | 42                   | 0.49%                | 368               | 0.90%             |
|                             | Guatemala                | 35                   | 0.41%                | 157               | 0.38%             |
|                             | Dominican Republic       | 31                   | 0.36%                | 68                | 0.17%             |

## Supplementary Table 5

|                             |                     | Publication<br>Count | Publication<br>Share | Citation<br>Count | Citation<br>Share |
|-----------------------------|---------------------|----------------------|----------------------|-------------------|-------------------|
| Latin America and Caribbean | Trinidad And Tobago | 28                   | 0.32%                | 69                | 0.17%             |
|                             | Barbados            | 24                   | 0.28%                | 29                | 0.07%             |
|                             | Grenada             | 19                   | 0.22%                | 54                | 0.13%             |
|                             | El Salvador         | 17                   | 0.20%                | 37                | 0.09%             |
|                             | Aruba               | 12                   | 0.14%                | 114               | 0.28%             |
|                             | Haiti               | 11                   | 0.13%                | 19                | 0.05%             |
|                             | Curacao             | 8                    | 0.09%                | 97                | 0.24%             |
|                             | Guyana              | 5                    | 0.06%                | 46                | 0.11%             |
|                             | Dominica            | 5                    | 0.06%                | 8                 | 0.02%             |
|                             | Antigua And Barbuda | 4                    | 0.05%                | 2                 | 0.00%             |
|                             | Belize              | 3                    | 0.03%                | 2                 | 0.00%             |
|                             | Suriname            | 1                    | 0.01%                | 21                | 0.05%             |
