# Supplementary material for: How the scientific community responded to the COVID-19 pandemic: A subject-level time-trend bibliometric analysis
Source: PubMed Central journal article supplement (PMC8483337; doi:10.1371/journal.pone.0258064), 2021-09-30
Supplement: pone.0258064.s006.pdf [file pone.0258064.s006.pdf]

## Supplementary Table 6

|                      | Publication Count | Publication Share | Citation Count | Citation Share |
|----------------------|-------------------|-------------------|----------------|----------------|
| United States        | 44,879            | 42.33%            | 376,897        | 47.91%         |
| United Kingdom       | 15,691            | 14.80%            | 154,236        | 19.61%         |
| Italy                | 13,510            | 12.74%            | 126,656        | 16.10%         |
| Canada               | 6,428             | 6.06%             | 54,622         | 6.94%          |
| Spain                | 6,292             | 5.93%             | 43,511         | 5.53%          |
| Australia            | 5,655             | 5.33%             | 53,556         | 6.81%          |
| France               | 5,505             | 5.19%             | 63,557         | 8.08%          |
| Germany              | 5,461             | 5.15%             | 69,720         | 8.86%          |
| Switzerland          | 2,834             | 2.67%             | 36,460         | 4.63%          |
| Saudi Arabia         | 2,809             | 2.65%             | 15,421         | 1.96%          |
| Japan                | 2,794             | 2.64%             | 22,549         | 2.87%          |
| Netherlands          | 2,654             | 2.50%             | 38,399         | 4.88%          |
| South Korea          | 1,958             | 1.85%             | 18,069         | 2.30%          |
| Belgium              | 1,924             | 1.81%             | 18,727         | 2.38%          |
| Singapore            | 1,912             | 1.80%             | 28,295         | 3.60%          |
| Sweden               | 1,591             | 1.50%             | 16,833         | 2.14%          |
| Poland               | 1,560             | 1.47%             | 8,374          | 1.06%          |
| Israel               | 1,461             | 1.38%             | 9,939          | 1.26%          |
| Ireland              | 1,365             | 1.29%             | 9,040          | 1.15%          |
| Greece               | 1,356             | 1.28%             | 14,984         | 1.90%          |
| Taiwan               | 1,276             | 1.20%             | 11,111         | 1.41%          |
| Portugal             | 1,257             | 1.19%             | 6,286          | 0.80%          |
| Austria              | 1,185             | 1.12%             | 16,089         | 2.05%          |
| Denmark              | 1,105             | 1.04%             | 14,159         | 1.80%          |
| Norway               | 849               | 0.80%             | 7,709          | 0.98%          |
| New Zealand          | 841               | 0.79%             | 6,897          | 0.88%          |
| United Arab Emirates | 819               | 0.77%             | 4,219          | 0.54%          |
| Romania              | 635               | 0.60%             | 2,965          | 0.38%          |
| Chile                | 627               | 0.59%             | 2,776          | 0.35%          |
| Finland              | 601               | 0.57%             | 4,779          | 0.61%          |
| Qatar                | 553               | 0.52%             | 2,350          | 0.30%          |
| Czech Republic       | 447               | 0.42%             | 2,487          | 0.32%          |
| Croatia              | 358               | 0.34%             | 2,197          | 0.28%          |
| Hungary              | 319               | 0.30%             | 2,648          | 0.34%          |
| Slovenia             | 273               | 0.26%             | 1,839          | 0.23%          |
| Oman                 | 273               | 0.26%             | 2,634          | 0.33%          |
| Cyprus               | 239               | 0.23%             | 1,211          | 0.15%          |
| Kuwait               | 226               | 0.21%             | 1,487          | 0.19%          |
| Slovakia             | 161               | 0.15%             | 469            | 0.06%          |
| Lithuania            | 132               | 0.12%             | 945            | 0.12%          |
| Uruguay              | 131               | 0.12%             | 424            | 0.05%          |
| Malta                | 113               | 0.11%             | 381            | 0.05%          |
| Luxembourg           | 112               | 0.11%             | 737            | 0.09%          |
| Bahrain              | 110               | 0.10%             | 252            | 0.03%          |

High Income

## Supplementary Table 6

|                    |                     | Publication<br>Count | Publication<br>Share | Citation<br>Count | Citation<br>Share |        |
|--------------------|---------------------|----------------------|----------------------|-------------------|-------------------|--------|
| High Income        | Estonia             | 94                   | 0.09%                | 1,151             | 0.15%             |        |
|                    | Panama              | 60                   | 0.06%                | 1,063             | 0.14%             |        |
|                    | Brunei Darussalam   | 56                   | 0.05%                | 482               | 0.06%             |        |
|                    | Latvia              | 44                   | 0.04%                | 95                | 0.01%             |        |
|                    | Puerto Rico         | 42                   | 0.04%                | 368               | 0.05%             |        |
|                    | Iceland             | 38                   | 0.04%                | 555               | 0.07%             |        |
|                    | Mauritius           | 33                   | 0.03%                | 384               | 0.05%             |        |
|                    | Trinidad And Tobago | 28                   | 0.03%                | 69                | 0.01%             |        |
|                    | Barbados            | 24                   | 0.02%                | 29                | 0.00%             |        |
|                    | Liechtenstein       | 15                   | 0.01%                | 39                | 0.00%             |        |
|                    | Gibraltar           | 12                   | 0.01%                | 9                 | 0.00%             |        |
|                    | Aruba               | 12                   | 0.01%                | 114               | 0.01%             |        |
|                    | Monaco              | 8                    | 0.01%                | 22                | 0.00%             |        |
|                    | Curacao             | 8                    | 0.01%                | 97                | 0.01%             |        |
|                    | Greenland           | 7                    | 0.01%                | 1                 | 0.00%             |        |
|                    | Faroe Islands       | 7                    | 0.01%                | 119               | 0.02%             |        |
|                    | Bermuda             | 6                    | 0.01%                | 26                | 0.00%             |        |
|                    | San Marino          | 5                    | 0.00%                | 83                | 0.01%             |        |
|                    | New Caledonia       | 5                    | 0.00%                | 8                 | 0.00%             |        |
|                    | Andorra             | 5                    | 0.00%                | 20                | 0.00%             |        |
|                    | French Polynesia    | 4                    | 0.00%                | 2                 | 0.00%             |        |
|                    | Antigua And Barbuda | 4                    | 0.00%                | 2                 | 0.00%             |        |
|                    | Seychelles          | 3                    | 0.00%                | 5                 | 0.00%             |        |
|                    | Guam                | 2                    | 0.00%                | 11                | 0.00%             |        |
|                    | Upper-middle Income | China                | 16,485               | 42.73%            | 411,151           | 81.70% |
|                    |                     | Brazil               | 4,636                | 12.02%            | 22,635            | 4.50%  |
| Iran               |                     | 4,142                | 10.74%               | 20,598            | 4.09%             |        |
| Turkey             |                     | 3,377                | 8.75%                | 13,287            | 2.64%             |        |
| South Africa       |                     | 2,058                | 5.33%                | 9,280             | 1.84%             |        |
| Malaysia           |                     | 1,389                | 3.60%                | 4,867             | 0.97%             |        |
| Mexico             |                     | 1,298                | 3.36%                | 7,287             | 1.45%             |        |
| Indonesia          |                     | 1,246                | 3.23%                | 5,151             | 1.02%             |        |
| Russian Federation |                     | 937                  | 2.43%                | 12,984            | 2.58%             |        |
| Thailand           |                     | 792                  | 2.05%                | 5,276             | 1.05%             |        |
| Colombia           |                     | 780                  | 2.02%                | 5,478             | 1.09%             |        |
| Argentina          |                     | 631                  | 1.64%                | 3,821             | 0.76%             |        |
| Jordan             |                     | 583                  | 1.51%                | 2,331             | 0.46%             |        |
| Peru               |                     | 509                  | 1.32%                | 3,181             | 0.63%             |        |
| Lebanon            |                     | 463                  | 1.20%                | 2,467             | 0.49%             |        |
| Iraq               |                     | 412                  | 1.07%                | 1,530             | 0.30%             |        |
| Serbia             |                     | 290                  | 0.75%                | 801               | 0.16%             |        |
| Venezuela          |                     | 282                  | 0.73%                | 2,004             | 0.40%             |        |
| Ecuador            |                     | 270                  | 0.70%                | 1,679             | 0.33%             |        |
| Georgia            |                     | 228                  | 0.59%                | 661               | 0.13%             |        |

## Supplementary Table 6

|                     | Publication Count      | Publication Share | Citation Count | Citation Share |        |
|---------------------|------------------------|-------------------|----------------|----------------|--------|
| Upper-middle Income | Bulgaria               | 129               | 0.33%          | 601            | 0.12%  |
|                     | Kazakhstan             | 119               | 0.31%          | 400            | 0.08%  |
|                     | Cuba                   | 101               | 0.26%          | 148            | 0.03%  |
|                     | Bosnia And Herzegovina | 86                | 0.22%          | 143            | 0.03%  |
|                     | Libya                  | 73                | 0.19%          | 153            | 0.03%  |
|                     | Jamaica                | 73                | 0.19%          | 185            | 0.04%  |
|                     | Costa Rica             | 64                | 0.17%          | 232            | 0.05%  |
|                     | North Macedonia        | 53                | 0.14%          | 539            | 0.11%  |
|                     | Albania                | 52                | 0.13%          | 236            | 0.05%  |
|                     | Paraguay               | 43                | 0.11%          | 716            | 0.14%  |
|                     | Botswana               | 39                | 0.10%          | 119            | 0.02%  |
|                     | Fiji                   | 36                | 0.09%          | 93             | 0.02%  |
|                     | Azerbaijan             | 36                | 0.09%          | 195            | 0.04%  |
|                     | Guatemala              | 35                | 0.09%          | 157            | 0.03%  |
|                     | Gabon                  | 31                | 0.08%          | 115            | 0.02%  |
|                     | Dominican Republic     | 31                | 0.08%          | 68             | 0.01%  |
|                     | Belarus                | 31                | 0.08%          | 275            | 0.05%  |
|                     | Armenia                | 27                | 0.07%          | 162            | 0.03%  |
|                     | Montenegro             | 19                | 0.05%          | 23             | 0.00%  |
|                     | Grenada                | 19                | 0.05%          | 54             | 0.01%  |
|                     | Namibia                | 17                | 0.04%          | 48             | 0.01%  |
|                     | Maldives               | 12                | 0.03%          | 161            | 0.03%  |
|                     | Kosovo                 | 11                | 0.03%          | 11             | 0.00%  |
|                     | Turkmenistan           | 9                 | 0.02%          | 39             | 0.01%  |
|                     | Samoa                  | 9                 | 0.02%          | 9              | 0.00%  |
|                     | Guyana                 | 5                 | 0.01%          | 46             | 0.01%  |
|                     | Dominica               | 5                 | 0.01%          | 8              | 0.00%  |
|                     | Tonga                  | 3                 | 0.01%          | 0              | 0.00%  |
|                     | Belize                 | 3                 | 0.01%          | 2              | 0.00%  |
| Suriname            | 1                      | 0.00%             | 21             | 0.00%          |        |
| Equatorial Guinea   | 1                      | 0.00%             | 2              | 0.00%          |        |
| Lower-middle Income | India                  | 11,846            | 58.38%         | 45,356         | 55.19% |
|                     | Pakistan               | 1,999             | 9.85%          | 9,391          | 11.43% |
|                     | Egypt                  | 1,550             | 7.64%          | 6,585          | 8.01%  |
|                     | Nigeria                | 1,034             | 5.10%          | 3,062          | 3.73%  |
|                     | Bangladesh             | 1,034             | 5.10%          | 5,646          | 6.87%  |
|                     | Vietnam                | 549               | 2.71%          | 7,019          | 8.54%  |
|                     | Philippines            | 536               | 2.64%          | 1,688          | 2.05%  |
|                     | Morocco                | 496               | 2.44%          | 1,544          | 1.88%  |
|                     | Nepal                  | 432               | 2.13%          | 2,972          | 3.62%  |
|                     | Kenya                  | 347               | 1.71%          | 1,033          | 1.26%  |
|                     | Ghana                  | 320               | 1.58%          | 804            | 0.98%  |
|                     | Tunisia                | 232               | 1.14%          | 1,156          | 1.41%  |
|                     | Ukraine                | 221               | 1.09%          | 797            | 0.97%  |

## Supplementary Table 6

|                     |                                  | Publication<br>Count | Publication<br>Share | Citation<br>Count | Citation<br>Share |
|---------------------|----------------------------------|----------------------|----------------------|-------------------|-------------------|
| Lower-middle Income | Cameroon                         | 160                  | 0.79%                | 714               | 0.87%             |
|                     | Sri Lanka                        | 146                  | 0.72%                | 796               | 0.97%             |
|                     | Algeria                          | 141                  | 0.69%                | 383               | 0.47%             |
|                     | Tanzania                         | 118                  | 0.58%                | 539               | 0.66%             |
|                     | Zimbabwe                         | 103                  | 0.51%                | 418               | 0.51%             |
|                     | Palestine                        | 99                   | 0.49%                | 207               | 0.25%             |
|                     | Senegal                          | 91                   | 0.45%                | 923               | 1.12%             |
|                     | Zambia                           | 79                   | 0.39%                | 270               | 0.33%             |
|                     | Bolivia                          | 68                   | 0.34%                | 1,220             | 1.48%             |
|                     | Nicaragua                        | 48                   | 0.24%                | 69                | 0.08%             |
|                     | Honduras                         | 44                   | 0.22%                | 1,353             | 1.65%             |
|                     | Congo                            | 39                   | 0.19%                | 1,279             | 1.56%             |
|                     | Benin                            | 33                   | 0.16%                | 93                | 0.11%             |
|                     | Uzbekistan                       | 30                   | 0.15%                | 31                | 0.04%             |
|                     | Myanmar                          | 27                   | 0.13%                | 49                | 0.06%             |
|                     | Cambodia                         | 27                   | 0.13%                | 323               | 0.39%             |
|                     | Cote D'Ivoire                    | 18                   | 0.09%                | 386               | 0.47%             |
|                     | El Salvador                      | 17                   | 0.08%                | 37                | 0.05%             |
|                     | Bhutan                           | 14                   | 0.07%                | 22                | 0.03%             |
|                     | Papua New Guinea                 | 13                   | 0.06%                | 59                | 0.07%             |
|                     | Mongolia                         | 10                   | 0.05%                | 39                | 0.05%             |
|                     | Lesotho                          | 9                    | 0.04%                | 42                | 0.05%             |
|                     | Moldova                          | 6                    | 0.03%                | 15                | 0.02%             |
|                     | Mauritania                       | 6                    | 0.03%                | 12                | 0.01%             |
|                     | Solomon Islands                  | 5                    | 0.02%                | 21                | 0.03%             |
|                     | Vanuatu                          | 4                    | 0.02%                | 7                 | 0.01%             |
|                     | Timor-Leste                      | 3                    | 0.01%                | 2                 | 0.00%             |
|                     | Djibouti                         | 3                    | 0.01%                | 3                 | 0.00%             |
| Angola              | 3                                | 0.01%                | 0                    | 0.00%             |                   |
| Comoros             | 1                                | 0.00%                | 3                    | 0.00%             |                   |
| Low Income          | Ethiopia                         | 471                  | 33.88%               | 1,170             | 24.14%            |
|                     | Uganda                           | 218                  | 15.68%               | 776               | 16.01%            |
|                     | Sudan                            | 139                  | 10.00%               | 619               | 12.77%            |
|                     | Democratic Republic Of The Congo | 87                   | 6.26%                | 300               | 6.19%             |
|                     | Yemen                            | 86                   | 6.19%                | 295               | 6.09%             |
|                     | Malawi                           | 75                   | 5.40%                | 265               | 5.47%             |
|                     | Mozambique                       | 65                   | 4.68%                | 926               | 19.11%            |
|                     | Rwanda                           | 55                   | 3.96%                | 159               | 3.28%             |
|                     | Afghanistan                      | 53                   | 3.81%                | 107               | 2.21%             |
|                     | Syria                            | 40                   | 2.88%                | 68                | 1.40%             |
|                     | Mali                             | 40                   | 2.88%                | 429               | 8.85%             |
|                     | Burkina Faso                     | 36                   | 2.59%                | 49                | 1.01%             |
|                     | Sierra Leone                     | 35                   | 2.52%                | 59                | 1.22%             |
|                     | Guinea                           | 27                   | 1.94%                | 117               | 2.41%             |

## Supplementary Table 6

|            |                          | Publication<br>Count | Publication<br>Share | Citation<br>Count | Citation<br>Share |
|------------|--------------------------|----------------------|----------------------|-------------------|-------------------|
| Low Income | Madagascar               | 25                   | 1.80%                | 58                | 1.20%             |
|            | Somalia                  | 15                   | 1.08%                | 61                | 1.26%             |
|            | Togo                     | 13                   | 0.94%                | 26                | 0.54%             |
|            | Niger                    | 13                   | 0.94%                | 4                 | 0.08%             |
|            | Haiti                    | 11                   | 0.79%                | 19                | 0.39%             |
|            | Liberia                  | 10                   | 0.72%                | 39                | 0.80%             |
|            | Guinea-Bissau            | 10                   | 0.72%                | 111               | 2.29%             |
|            | Eritrea                  | 6                    | 0.43%                | 13                | 0.27%             |
|            | Burundi                  | 6                    | 0.43%                | 3                 | 0.06%             |
|            | Chad                     | 5                    | 0.36%                | 5                 | 0.10%             |
|            | Central African Republic | 4                    | 0.29%                | 53                | 1.09%             |
|            | Tajikistan               | 2                    | 0.14%                | 4                 | 0.08%             |
