# Supplementary material for: How the scientific community responded to the COVID-19 pandemic: A subject-level time-trend bibliometric analysis
Source: PubMed Central journal article supplement (PMC8483337; doi:10.1371/journal.pone.0258064), 2021-09-30
Supplement: pone.0258064.s007.pdf [file pone.0258064.s007.pdf]

## Supplementary Table 7

|                | Annual Publications | COVID-19 Share |
|----------------|---------------------|----------------|
| Bangladesh     | 3,135               | 32.98%         |
| Saudi Arabia   | 10,898              | 25.78%         |
| Ireland        | 7,174               | 19.03%         |
| Italy          | 71,240              | 18.96%         |
| Nigeria        | 5,602               | 18.46%         |
| Singapore      | 11,459              | 16.69%         |
| United Kingdom | 97,681              | 16.06%         |
| South Africa   | 13,009              | 15.82%         |
| Pakistan       | 12,904              | 15.49%         |
| Switzerland    | 21,379              | 13.26%         |
| Greece         | 10,907              | 12.43%         |
| Belgium        | 15,688              | 12.26%         |
| Israel         | 12,235              | 11.94%         |
| Egypt          | 13,327              | 11.63%         |
| Spain          | 54,537              | 11.54%         |
| Canada         | 59,968              | 10.72%         |
| United States  | 422,808             | 10.61%         |
| Australia      | 53,610              | 10.55%         |
| Turkey         | 33,536              | 10.07%         |
| Austria        | 12,362              | 9.59%          |
| Portugal       | 14,295              | 8.79%          |
| India          | 135,788             | 8.72%          |
| Netherlands    | 30,457              | 8.71%          |
| Iran           | 48,306              | 8.57%          |
| France         | 66,352              | 8.30%          |
| Mexico         | 16,346              | 7.94%          |
| Denmark        | 13,979              | 7.90%          |
| Sweden         | 20,421              | 7.79%          |
| Brazil         | 60,148              | 7.71%          |
| Malaysia       | 23,661              | 5.87%          |
| Germany        | 104,396             | 5.23%          |
| Indonesia      | 26,948              | 4.62%          |
| Poland         | 35,663              | 4.37%          |
| China          | 528,263             | 3.12%          |
| South Korea    | 66,376              | 2.95%          |
| Japan          | 98,793              | 2.83%          |
