# Supplementary material for: How the scientific community responded to the COVID-19 pandemic: A subject-level time-trend bibliometric analysis
Source: PubMed Central journal article supplement (PMC8483337; doi:10.1371/journal.pone.0258064), 2021-09-30
Supplement: pone.0258064.s008.pdf [file pone.0258064.s008.pdf]

## Supplementary Table 8

|                | Degree | Publications | Degree to Publications Ratio | Degree Centrality |
|----------------|--------|--------------|------------------------------|-------------------|
| United States  | 31,668 | 44,879       | 1.42                         | 92.0%             |
| United Kingdom | 21,517 | 15,691       | 0.73                         | 82.6%             |
| Italy          | 15,529 | 13,510       | 0.87                         | 76.1%             |
| China          | 11,803 | 16,485       | 1.40                         | 70.9%             |
| Germany        | 10,967 | 5,461        | 0.50                         | 65.3%             |
| Canada         | 10,009 | 6,428        | 0.64                         | 71.8%             |
| Australia      | 9,969  | 5,655        | 0.57                         | 70.9%             |
| Spain          | 9,819  | 6,292        | 0.64                         | 71.4%             |
| France         | 9,465  | 5,505        | 0.58                         | 74.6%             |
| India          | 8,571  | 11,846       | 1.38                         | 74.6%             |
| Switzerland    | 7,606  | 2,834        | 0.37                         | 74.6%             |
| Netherlands    | 7,326  | 2,654        | 0.36                         | 67.1%             |
| Brazil         | 6,249  | 4,636        | 0.74                         | 68.5%             |
| Belgium        | 5,320  | 1,924        | 0.36                         | 60.1%             |
| Sweden         | 4,775  | 1,591        | 0.33                         | 61.5%             |
| South Africa   | 4,597  | 2,058        | 0.45                         | 70.0%             |
| Saudi Arabia   | 4,544  | 2,809        | 0.62                         | 59.6%             |
| Japan          | 4,218  | 2,794        | 0.66                         | 67.1%             |
| Turkey         | 3,899  | 3,377        | 0.87                         | 60.6%             |
| Iran           | 3,752  | 4,142        | 1.10                         | 62.0%             |
| Austria        | 3,617  | 1,185        | 0.33                         | 54.9%             |
| Portugal       | 3,576  | 1,257        | 0.35                         | 58.2%             |
| Greece         | 3,422  | 1,356        | 0.40                         | 51.2%             |
| Singapore      | 3,420  | 1,912        | 0.56                         | 57.3%             |
| Poland         | 3,294  | 1,560        | 0.47                         | 59.6%             |
| Egypt          | 3,273  | 1,550        | 0.47                         | 62.9%             |
| Denmark        | 3,253  | 1,105        | 0.34                         | 52.6%             |
| Pakistan       | 3,043  | 1,999        | 0.66                         | 64.8%             |
| Ireland        | 2,997  | 1,365        | 0.46                         | 57.7%             |
| South Korea    | 2,788  | 1,958        | 0.70                         | 52.6%             |
| Mexico         | 2,700  | 1,298        | 0.48                         | 61.0%             |
| Malaysia       | 2,609  | 1,389        | 0.53                         | 62.4%             |
| Israel         | 2,453  | 1,461        | 0.60                         | 49.8%             |
| Nigeria        | 2,272  | 1,034        | 0.46                         | 64.8%             |
| Taiwan         | 1,840  | 1,276        | 0.69                         | 49.3%             |
| Bangladesh     | 1,801  | 1,034        | 0.57                         | 58.7%             |
| Indonesia      | 1,444  | 1,246        | 0.86                         | 58.7%             |
