# Supplementary material for: How the scientific community responded to the COVID-19 pandemic: A subject-level time-trend bibliometric analysis
Source: PubMed Central journal article supplement (PMC8483337; doi:10.1371/journal.pone.0258064), 2021-09-30
Supplement: pone.0258064.s009.pdf [file pone.0258064.s009.pdf]

## Supplementary Table 9

|                | Open-Access<br>Percent | Open-Access<br>Publications |
|----------------|------------------------|-----------------------------|
| Sweden         | 86.23%                 | 1,102                       |
| Netherlands    | 82.67%                 | 1,836                       |
| Brazil         | 82.03%                 | 3,067                       |
| Switzerland    | 81.67%                 | 1,912                       |
| Austria        | 81.50%                 | 806                         |
| Germany        | 80.43%                 | 3,460                       |
| Belgium        | 80.01%                 | 1,241                       |
| Japan          | 79.99%                 | 1,671                       |
| South Korea    | 79.96%                 | 1,325                       |
| Poland         | 79.93%                 | 980                         |
| Taiwan         | 79.48%                 | 821                         |
| China          | 77.99%                 | 10,011                      |
| Denmark        | 77.96%                 | 711                         |
| Saudi Arabia   | 77.38%                 | 1,563                       |
| Portugal       | 77.21%                 | 752                         |
| United Kingdom | 76.99%                 | 10,213                      |
| Singapore      | 76.34%                 | 1,171                       |
| Italy          | 76.00%                 | 8,114                       |
| Egypt          | 75.99%                 | 918                         |
| Canada         | 75.78%                 | 3,887                       |
| Greece         | 74.28%                 | 800                         |
| Bangladesh     | 74.11%                 | 541                         |
| Australia      | 73.95%                 | 3,529                       |
| Mexico         | 73.78%                 | 740                         |
| Turkey         | 73.20%                 | 1,863                       |
| France         | 73.14%                 | 3,241                       |
| United States  | 73.02%                 | 23,500                      |
| Ireland        | 73.00%                 | 803                         |
| South Africa   | 72.65%                 | 1,113                       |
| Israel         | 72.55%                 | 806                         |
| Spain          | 72.50%                 | 3,656                       |
| Pakistan       | 71.63%                 | 1,035                       |
| Malaysia       | 69.77%                 | 771                         |
| Iran           | 68.44%                 | 2,067                       |
| Nigeria        | 68.25%                 | 531                         |
| India          | 67.31%                 | 5,843                       |
| Indonesia      | 64.03%                 | 680                         |
