# Supplementary material for: How the scientific community responded to the COVID-19 pandemic: A subject-level time-trend bibliometric analysis
Source: PubMed Central journal article supplement (PMC8483337; doi:10.1371/journal.pone.0258064), 2021-09-30
Supplement: pone.0258064.s010.pdf [file pone.0258064.s010.pdf]

## Supplementary Table 10

| Journal                                                           | Publication Count |
|-------------------------------------------------------------------|-------------------|
| International Journal Of Environmental Research And Public Health | 1,556             |
| Plos One                                                          | 1,243             |
| Journal Of Medical Virology                                       | 1,004             |
| Frontiers In Psychology                                           | 974               |
| BMJ (Clinical Research Ed.)                                       | 869               |
| Frontiers In Public Health                                        | 737               |
| Frontiers In Medicine                                             | 723               |
| Cureus                                                            | 707               |
| The BMJ                                                           | 686               |
| Disaster Medicine And Public Health Preparedness                  | 615               |
| Sustainability (Switzerland)                                      | 569               |
| International Journal Of Infectious Diseases                      | 567               |
| Frontiers In Psychiatry                                           | 558               |
| Scientific Reports                                                | 541               |
| Clinical Infectious Diseases                                      | 526               |
| JAMA                                                              | 502               |
| The Lancet                                                        | 490               |
| Infection Control And Hospital Epidemiology                       | 484               |
| Medical Hypotheses                                                | 441               |
| Journal Of Medical Internet Research                              | 438               |
| Science Of The Total Environment                                  | 427               |
| New England Journal Of Medicine                                   | 426               |
| Journal Of Infection                                              | 419               |
| Nature                                                            | 407               |
| Journal Of Clinical Medicine                                      | 395               |
| Dermatologic Therapy                                              | 384               |
| Eclinicalmedicine                                                 | 368               |
| Frontiers In Pharmacology                                         | 365               |
| Frontiers In Immunology                                           | 354               |
| Annals Of The Rheumatic Diseases                                  | 341               |
