# Supplementary material for: How the scientific community responded to the COVID-19 pandemic: A subject-level time-trend bibliometric analysis
Source: PubMed Central journal article supplement (PMC8483337; doi:10.1371/journal.pone.0258064), 2021-09-30
Supplement: pone.0258064.s011.pdf [file pone.0258064.s011.pdf]

## Supplementary Table 11

| Journal                                                           | Citation Count |
|-------------------------------------------------------------------|----------------|
| New England Journal Of Medicine                                   | 67,015         |
| The Lancet                                                        | 67,006         |
| JAMA                                                              | 43,635         |
| Nature                                                            | 22,644         |
| Journal Of Medical Virology                                       | 20,031         |
| Science                                                           | 18,210         |
| The Lancet Infectious Diseases                                    | 15,488         |
| Cell                                                              | 14,464         |
| Radiology                                                         | 12,509         |
| The Lancet Respiratory Medicine                                   | 12,458         |
| Clinical Infectious Diseases                                      | 12,211         |
| The BMJ                                                           | 11,840         |
| Science Of The Total Environment                                  | 11,161         |
| Nature Medicine                                                   | 10,621         |
| International Journal Of Infectious Diseases                      | 9,990          |
| Journal Of Infection                                              | 9,096          |
| International Journal Of Environmental Research And Public Health | 8,938          |
| International Journal Of Antimicrobial Agents                     | 7,993          |
| Morbidity And Mortality Weekly Report                             | 7,516          |
| Eurosurveillance                                                  | 7,035          |
| Proceedings Of The National Academy Of Sciences (PNAS)            | 6,903          |
| Annals Of Internal Medicine                                       | 6,860          |
| Journal Of Thrombosis And Haemostasis                             | 6,334          |
| Intensive Care Medicine                                           | 6,049          |
| Emerging Microbes And Infections                                  | 6,004          |
| The Lancet Psychiatry                                             | 5,956          |
| Brain, Behavior, And Immunity                                     | 5,936          |
| JAMA Cardiology                                                   | 5,833          |
| Emerging Infectious Diseases                                      | 5,755          |
| Psychiatry Research                                               | 5,318          |
