# Supplementary material for: How the scientific community responded to the COVID-19 pandemic: A subject-level time-trend bibliometric analysis
Source: PubMed Central journal article supplement (PMC8483337; doi:10.1371/journal.pone.0258064), 2021-09-30
Supplement: pone.0258064.s012.pdf [file pone.0258064.s012.pdf]

**Supplementary Table 12**

|                                       |                                                                   | Publication Count | Publication Share | Citation Count | Citation Share |
|---------------------------------------|-------------------------------------------------------------------|-------------------|-------------------|----------------|----------------|
| Health Sciences                       | International Journal Of Environmental Research And Public Health | 1,327             | 1.60%             | 8,922          | 1.04%          |
|                                       | Journal Of Medical Virology                                       | 950               | 1.15%             | 20,008         | 2.33%          |
|                                       | BMJ (Clinical Research Ed.)                                       | 782               | 0.94%             | 3,944          | 0.46%          |
|                                       | The BMJ                                                           | 686               | 0.83%             | 11,840         | 1.38%          |
|                                       | International Journal Of Infectious Diseases                      | 567               | 0.68%             | 9,990          | 1.16%          |
|                                       | The Lancet                                                        | 490               | 0.59%             | 67,006         | 7.79%          |
|                                       | Frontiers In Public Health                                        | 460               | 0.56%             | 1,782          | 0.21%          |
|                                       | JAMA                                                              | 432               | 0.52%             | 42,740         | 4.97%          |
|                                       | Medical Hypotheses                                                | 421               | 0.51%             | 1,653          | 0.19%          |
|                                       | Journal Of Infection                                              | 419               | 0.51%             | 9,096          | 1.06%          |
| Life Sciences                         | Plos One                                                          | 1,210             | 4.48%             | 4,603          | 1.64%          |
|                                       | Journal Of Medical Virology                                       | 950               | 3.51%             | 20,008         | 7.13%          |
|                                       | Frontiers In Immunology                                           | 335               | 1.24%             | 2,445          | 0.87%          |
|                                       | Journal Of Biomolecular Structure And Dynamics                    | 306               | 1.13%             | 3,976          | 1.42%          |
|                                       | Annals Of The Rheumatic Diseases                                  | 245               | 0.91%             | 2,499          | 0.89%          |
|                                       | Psychiatry Research                                               | 244               | 0.90%             | 5,293          | 1.89%          |
|                                       | Nature Communications                                             | 241               | 0.89%             | 3,869          | 1.38%          |
|                                       | International Journal Of Research In Pharmaceutical Sciences      | 241               | 0.89%             | 187            | 0.07%          |
|                                       | American Journal Of Tropical Medicine And Hygiene                 | 216               | 0.80%             | 989            | 0.35%          |
|                                       | Journal Of Clinical Virology                                      | 194               | 0.72%             | 3,633          | 1.29%          |
|                                       | Viruses                                                           | 192               | 0.71%             | 2,629          | 0.94%          |
|                                       | International Journal Of Molecular Sciences                       | 191               | 0.71%             | 1,320          | 0.47%          |
|                                       | Frontiers In Pharmacology                                         | 188               | 0.70%             | 488            | 0.17%          |
|                                       | Nature Medicine                                                   | 153               | 0.57%             | 10,524         | 3.75%          |
|                                       | Vaccines                                                          | 148               | 0.55%             | 476            | 0.17%          |
|                                       | Eurosurveillance                                                  | 146               | 0.54%             | 7,035          | 2.51%          |
|                                       | Environmental Research                                            | 146               | 0.54%             | 1,338          | 0.48%          |
|                                       | Emerging Microbes And Infections                                  | 141               | 0.52%             | 6,004          | 2.14%          |
|                                       | Frontiers In Neurology                                            | 138               | 0.51%             | 504            | 0.18%          |
|                                       | Diabetes Research And Clinical Practice                           | 137               | 0.51%             | 1,407          | 0.50%          |
| Physical Sciences                     | International Journal Of Environmental Research And Public Health | 1,327             | 8.76%             | 8,922          | 10.40%         |
|                                       | Sustainability (Switzerland)                                      | 569               | 3.76%             | 1,569          | 1.83%          |
|                                       | Science Of The Total Environment                                  | 427               | 2.82%             | 11,161         | 13.00%         |
|                                       | Nature Communications                                             | 241               | 1.59%             | 3,869          | 4.51%          |
|                                       | Chaos, Solitons And Fractals                                      | 231               | 1.53%             | 2,913          | 3.39%          |
|                                       | International Journal Of Molecular Sciences                       | 191               | 1.26%             | 1,320          | 1.54%          |
|                                       | Ieee Access                                                       | 189               | 1.25%             | 849            | 0.99%          |
|                                       | Journal Of Chemical Education                                     | 186               | 1.23%             | 355            | 0.41%          |
|                                       | Morbidity And Mortality Weekly Report                             | 184               | 1.22%             | 7,516          | 8.76%          |
|                                       | Environmental Research                                            | 146               | 0.96%             | 1,338          | 1.56%          |
|                                       | Journal Of Cleaner Production                                     | 110               | 0.73%             | 391            | 0.46%          |
|                                       | Indian Journal Of Forensic Medicine And Toxicology                | 104               | 0.69%             | 8              | 0.01%          |
|                                       | Environmental Science And Pollution Research                      | 91                | 0.60%             | 116            | 0.14%          |
|                                       | Applied Sciences (Switzerland)                                    | 88                | 0.58%             | 162            | 0.19%          |
|                                       | Infectious Disease Modelling                                      | 84                | 0.55%             | 1,034          | 1.20%          |
|                                       | Computers, Materials And Continua                                 | 83                | 0.55%             | 169            | 0.20%          |
|                                       | Sustainability (Switzerland)                                      | 569               | 2.80%             | 1,569          | 2.21%          |
|                                       | Frontiers In Psychology                                           | 494               | 2.43%             | 1,152          | 1.62%          |
|                                       | Asian Journal Of Psychiatry                                       | 237               | 1.17%             | 3,449          | 4.85%          |
|                                       | Journal Of Chemical Education                                     | 186               | 0.92%             | 355            | 0.50%          |
| Morbidity And Mortality Weekly Report | 184                                                               | 0.91%             | 7,516             | 10.57%         |                |
| Social Sciences                       | Psychological Trauma: Theory, Research, Practice, And Policy      | 156               | 0.77%             | 990            | 1.39%          |
|                                       | Economic And Political Weekly                                     | 134               | 0.66%             | 104            | 0.15%          |
|                                       | Journal Of Affective Disorders                                    | 124               | 0.61%             | 1,160          | 1.63%          |
|                                       | Personality And Individual Differences                            | 119               | 0.59%             | 344            | 0.48%          |
|                                       | Journal Of Cleaner Production                                     | 110               | 0.54%             | 391            | 0.55%          |
|                                       | Finance Research Letters                                          | 110               | 0.54%             | 1,116          | 1.57%          |
|                                       | Indian Journal Of Forensic Medicine And Toxicology                | 104               | 0.51%             | 8              | 0.01%          |
|                                       | World Development                                                 | 102               | 0.50%             | 309            | 0.43%          |
