# Supplementary material for: How the scientific community responded to the COVID-19 pandemic: A subject-level time-trend bibliometric analysis
Source: PubMed Central journal article supplement (PMC8483337; doi:10.1371/journal.pone.0258064), 2021-09-30
Supplement: pone.0258064.s014.pdf [file pone.0258064.s014.pdf]

## Supplementary Figure 2

|                | National       | Bi-National   | Multi-National |
|----------------|----------------|---------------|----------------|
| Switzerland    | 25.3% (716)    | 28.8% (817)   | 45.9% (1,301)  |
| Sweden         | 25.6% (407)    | 23.9% (380)   | 50.5% (804)    |
| Denmark        | 29.0% (320)    | 24.6% (272)   | 46.4% (513)    |
| Austria        | 29.5% (350)    | 24.9% (295)   | 45.6% (540)    |
| Netherlands    | 31.9% (846)    | 23.4% (621)   | 44.7% (1,187)  |
| Belgium        | 32.3% (622)    | 22.2% (427)   | 45.5% (875)    |
| Saudi Arabia   | 35.3% (991)    | 31.4% (882)   | 33.3% (936)    |
| Egypt          | 36.5% (566)    | 28.7% (445)   | 34.8% (539)    |
| Malaysia       | 37.5% (521)    | 27.4% (380)   | 35.1% (488)    |
| Bangladesh     | 38.2% (395)    | 27.6% (285)   | 34.2% (354)    |
| South Africa   | 38.8% (798)    | 24.1% (497)   | 37.1% (763)    |
| Australia      | 38.9% (2,197)  | 27.6% (1,560) | 33.6% (1,898)  |
| Pakistan       | 40.0% (800)    | 29.8% (596)   | 30.2% (603)    |
| Portugal       | 41.3% (519)    | 21.0% (264)   | 37.7% (474)    |
| Greece         | 41.7% (566)    | 24.6% (333)   | 33.7% (457)    |
| Canada         | 41.9% (2,694)  | 29.9% (1,919) | 28.2% (1,815)  |
| Germany        | 42.1% (2,299)  | 23.8% (1,298) | 34.1% (1,864)  |
| Nigeria        | 43.0% (445)    | 23.5% (243)   | 33.5% (346)    |
| Ireland        | 45.1% (615)    | 23.5% (321)   | 31.4% (429)    |
| United Kingdom | 48.0% (7,533)  | 25.6% (4,022) | 26.4% (4,136)  |
| Mexico         | 49.7% (645)    | 23.3% (302)   | 27.0% (351)    |
| France         | 52.2% (2,875)  | 19.4% (1,067) | 28.4% (1,563)  |
| Taiwan         | 53.6% (684)    | 21.9% (280)   | 24.5% (312)    |
| Singapore      | 54.0% (1,033)  | 17.8% (341)   | 28.1% (538)    |
| Israel         | 55.3% (808)    | 19.2% (281)   | 25.5% (372)    |
| Poland         | 56.1% (875)    | 15.6% (244)   | 28.3% (441)    |
| Spain          | 59.4% (3,739)  | 15.8% (995)   | 24.8% (1,558)  |
| South Korea    | 60.0% (1,175)  | 18.1% (354)   | 21.9% (429)    |
| Japan          | 60.7% (1,696)  | 17.7% (494)   | 21.6% (604)    |
| Italy          | 62.3% (8,411)  | 17.9% (2,423) | 19.8% (2,676)  |
| Brazil         | 63.1% (2,924)  | 18.2% (842)   | 18.8% (870)    |
| United States  | 65.0% (29,160) | 22.1% (9,896) | 13.0% (5,823)  |
| China          | 66.6% (10,978) | 20.9% (3,442) | 12.5% (2,065)  |
| Iran           | 66.9% (2,773)  | 18.9% (784)   | 14.1% (585)    |
| Indonesia      | 72.5% (903)    | 12.7% (158)   | 14.8% (185)    |
| Turkey         | 72.7% (2,456)  | 11.0% (371)   | 16.3% (550)    |
| India          | 72.8% (8,624)  | 14.6% (1,725) | 12.6% (1,497)  |
