# Supplementary material for: How the scientific community responded to the COVID-19 pandemic: A subject-level time-trend bibliometric analysis
Source: PubMed Central journal article supplement (PMC8483337; doi:10.1371/journal.pone.0258064), 2021-09-30

### Supplementary Figure 3

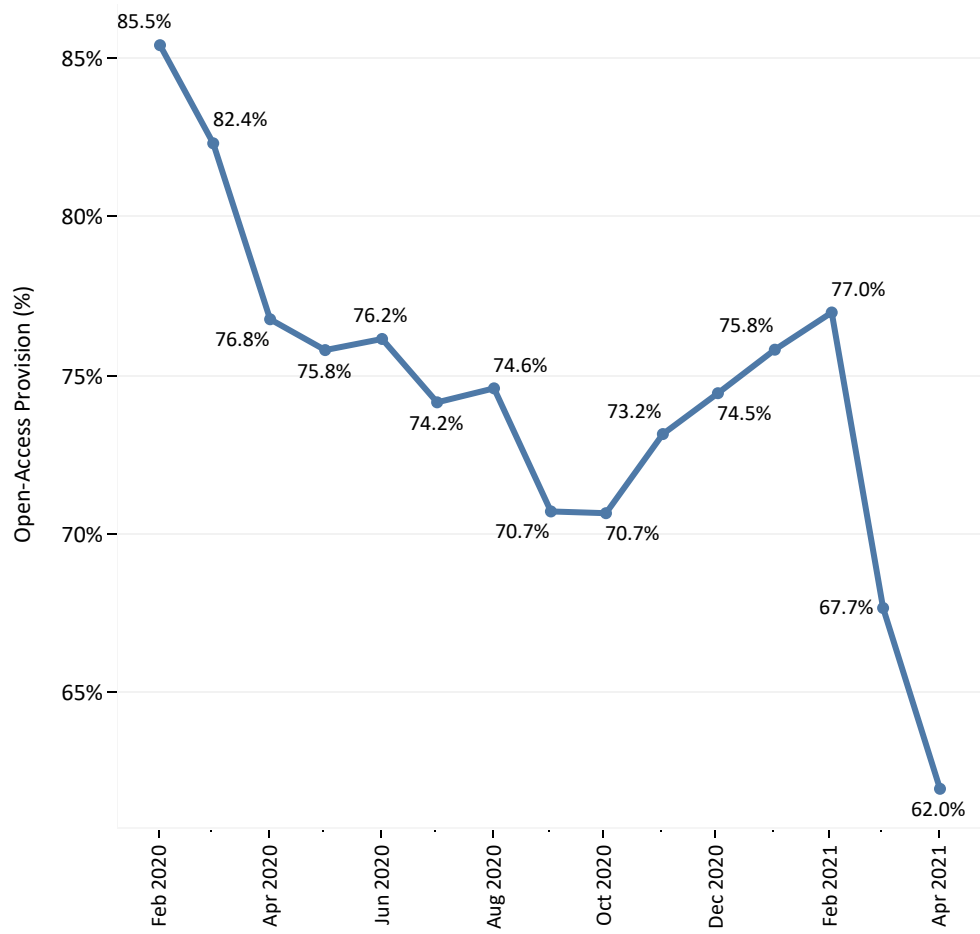

Supplement: pone.0258064.s015.pdf [file pone.0258064.s015.pdf]
