# Supplementary material for: How the scientific community responded to the COVID-19 pandemic: A subject-level time-trend bibliometric analysis
Source: PubMed Central journal article supplement (PMC8483337; doi:10.1371/journal.pone.0258064), 2021-09-30
Supplement: pone.0258064.s016.pdf [file pone.0258064.s016.pdf]

## Supplementary Figure 4

|                             |                              | Open-Access    |
|-----------------------------|------------------------------|----------------|
| Region                      | Europe and Central Asia      | 75.6% (34,013) |
|                             | North America                | 73.2% (26,174) |
|                             | East Asia and Pacific        | 76.3% (19,357) |
|                             | South Asia                   | 68.5% (7,543)  |
|                             | Middle East and North Africa | 71.7% (6,858)  |
|                             | Latin America and Caribbean  | 77.6% (5,200)  |
|                             | Sub-Saharan Africa           | 74.5% (2,721)  |
| Income Group                | High Income                  | 74.3% (60,613) |
|                             | Upper-middle Income          | 75.1% (22,288) |
|                             | Lower-middle Income          | 69.7% (10,437) |
|                             | Low Income                   | 83.0% (840)    |
| International Collaboration | National                     | 71.8% (65,462) |
|                             | Bi-national                  | 76.0% (12,665) |
|                             | Multi-national               | 78.7% (7,227)  |
