# Supplementary material for: How the scientific community responded to the COVID-19 pandemic: A subject-level time-trend bibliometric analysis
Source: PubMed Central journal article supplement (PMC8483337; doi:10.1371/journal.pone.0258064), 2021-09-30
Supplement: pone.0258064.s017.pdf [file pone.0258064.s017.pdf]

## Supplementary Figure 5

|                                                                   | Australia | Brazil | Canada | China  | France | Germany | India  | Iran   | Italy  | Japan | Netherlands | Pakistan | Saudi Arabia | South Africa | South Korea | Spain  | Switzerland | Turkey | United Kingdom | United States |
|-------------------------------------------------------------------|-----------|--------|--------|--------|--------|---------|--------|--------|--------|-------|-------------|----------|--------------|--------------|-------------|--------|-------------|--------|----------------|---------------|
| Annals Of The Rheumatic Diseases                                  | 4.40%     | 1.17%  | 2.93%  | 4.99%  | 16.13% | 11.14%  | 2.64%  | 0.29%  | 24.63% | 1.47% | 7.04%       |          |              | 0.59%        | 0.88%       | 7.92%  | 3.23%       | 1.17%  | 9.09%          | 23.46%        |
| BMJ (Clinical Research Ed.)                                       | 0.46%     | 0.23%  | 0.35%  | 0.35%  | 3.68%  | 0.12%   | 0.46%  |        | 0.12%  |       | 0.12%       |          | 0.12%        | 0.12%        |             |        | 0.12%       |        | 11.85%         | 2.76%         |
| Clinical Infectious Diseases                                      | 2.66%     | 1.33%  | 2.66%  | 8.94%  | 5.32%  | 2.28%   | 1.14%  |        | 2.85%  | 1.90% | 2.66%       |          | 0.38%        | 1.90%        | 0.57%       | 2.09%  | 2.47%       | 0.38%  | 6.08%          | 45.63%        |
| Cureus                                                            |           | 0.14%  | 0.71%  | 0.28%  |        | 0.28%   | 4.38%  | 0.28%  | 0.85%  | 0.42% |             | 8.91%    | 2.26%        | 1.13%        | 0.14%       | 0.28%  |             | 0.28%  | 4.38%          | 60.54%        |
| Dermatologic Therapy                                              | 3.65%     | 5.47%  | 1.30%  | 3.91%  | 0.52%  | 6.51%   | 19.53% | 8.59%  | 33.59% |       |             | 0.26%    | 0.78%        | 0.52%        |             | 5.47%  | 10.94%      | 17.97% | 2.34%          | 22.66%        |
| Disaster Medicine And Public Health Preparedness                  | 1.14%     | 0.33%  | 1.46%  | 13.17% | 1.46%  | 0.49%   | 6.83%  | 12.03% | 6.99%  | 1.46% | 1.14%       | 3.41%    | 2.11%        | 0.65%        | 1.79%       | 0.65%  | 0.98%       | 2.76%  | 4.72%          | 24.23%        |
| Eclinicalmedicine                                                 | 1.63%     | 2.17%  | 6.79%  | 16.85% | 4.08%  | 3.26%   | 3.80%  | 0.27%  | 7.07%  | 0.54% | 2.72%       |          | 0.27%        | 2.72%        | 0.54%       | 4.62%  | 1.90%       | 0.54%  | 20.38%         | 32.88%        |
| Frontiers In Immunology                                           | 4.24%     | 6.50%  | 5.37%  | 16.67% | 3.39%  | 9.60%   | 5.37%  | 1.13%  | 10.17% | 1.13% | 2.54%       | 0.56%    | 0.56%        | 0.56%        | 0.56%       | 5.93%  | 1.69%       | 0.56%  | 7.91%          | 28.81%        |
| Frontiers In Medicine                                             | 2.35%     | 4.43%  | 2.49%  | 34.44% | 4.98%  | 3.73%   | 2.35%  | 1.80%  | 11.48% | 1.11% | 1.24%       | 1.24%    | 2.07%        | 0.83%        | 1.38%       | 3.18%  | 1.66%       | 0.83%  | 6.36%          | 24.20%        |
| Frontiers In Pharmacology                                         | 2.19%     | 0.82%  | 4.93%  | 30.96% | 3.29%  | 1.92%   | 9.86%  | 3.84%  | 14.79% | 1.37% | 1.10%       | 1.64%    | 1.92%        | 3.56%        | 1.37%       | 5.48%  | 1.10%       | 0.82%  | 5.21%          | 19.73%        |
| Frontiers In Psychiatry                                           | 3.94%     | 5.20%  | 5.02%  | 21.15% | 1.43%  | 2.15%   | 5.91%  | 1.79%  | 20.97% | 2.51% | 3.76%       | 1.08%    | 1.43%        | 0.72%        | 1.43%       | 5.02%  | 2.51%       | 2.15%  | 14.52%         | 22.94%        |
| Frontiers In Psychology                                           | 4.72%     | 3.18%  | 4.72%  | 15.09% | 2.67%  | 5.24%   | 2.16%  | 0.41%  | 22.69% | 0.31% | 2.16%       | 2.67%    | 1.44%        | 1.03%        | 0.82%       | 13.35% | 1.95%       | 2.36%  | 8.52%          | 20.74%        |
| Frontiers In Public Health                                        | 8.41%     | 2.71%  | 4.34%  | 21.71% | 3.12%  | 3.12%   | 7.73%  | 2.17%  | 11.26% | 0.81% | 0.54%       | 2.71%    | 3.80%        | 0.81%        | 2.04%       | 2.71%  | 2.99%       | 0.27%  | 10.85%         | 25.10%        |
| Infection Control And Hospital Epidemiology                       | 2.69%     | 2.89%  | 5.58%  | 10.33% | 0.83%  | 1.45%   | 2.27%  | 3.31%  | 5.17%  | 1.86% | 0.41%       | 1.45%    | 1.24%        | 1.03%        | 1.03%       | 1.86%  | 2.48%       | 0.21%  | 3.72%          | 51.24%        |
| International Journal Of Environmental Research And Public Health | 4.82%     | 2.44%  | 3.47%  | 14.97% | 3.08%  | 5.91%   | 1.35%  | 1.09%  | 17.93% | 3.86% | 1.61%       | 1.61%    | 3.60%        | 1.54%        | 4.95%       | 12.08% | 3.66%       | 0.58%  | 8.42%          | 17.22%        |
| International Journal Of Infectious Diseases                      | 2.47%     | 3.70%  | 1.94%  | 23.28% | 5.64%  | 6.17%   | 4.41%  | 0.53%  | 11.64% | 5.82% | 2.29%       | 0.88%    | 2.82%        | 2.47%        | 4.59%       | 3.53%  | 2.82%       | 1.76%  | 9.70%          | 19.40%        |
| JAMA                                                              | 0.80%     | 0.80%  | 2.39%  | 3.59%  | 1.99%  | 1.79%   | 0.60%  | 0.20%  | 1.59%  | 0.60% | 1.79%       |          | 0.20%        | 0.60%        | 0.40%       | 0.80%  | 2.19%       |        | 3.59%          | 66.14%        |
| Journal Of Clinical Medicine                                      | 2.03%     | 1.52%  | 1.52%  | 1.77%  | 8.35%  | 7.85%   | 0.76%  | 0.76%  | 25.06% | 6.84% | 0.25%       |          | 0.51%        | 1.27%        | 4.30%       | 10.38% | 3.54%       | 0.51%  | 3.80%          | 25.57%        |
| Journal Of Infection                                              | 2.86%     | 1.67%  | 0.95%  | 37.23% | 8.35%  | 2.39%   | 0.95%  | 0.48%  | 9.79%  | 3.58% | 1.43%       | 1.43%    | 0.72%        | 0.24%        | 1.43%       | 5.25%  | 1.67%       | 0.48%  | 19.33%         | 6.21%         |
| Journal Of Medical Internet Research                              | 5.71%     | 1.14%  | 10.05% | 25.57% | 3.65%  | 6.16%   | 0.46%  | 0.68%  | 5.25%  | 0.91% | 2.51%       | 1.37%    | 1.60%        | 0.23%        | 3.88%       | 4.11%  | 2.97%       | 0.23%  | 13.93%         | 36.30%        |
| Journal Of Medical Virology                                       | 1.20%     | 3.49%  | 1.59%  | 30.68% | 2.99%  | 1.99%   | 6.27%  | 2.99%  | 11.85% | 2.99% | 0.20%       | 3.19%    | 1.49%        | 0.50%        | 0.90%       | 2.19%  | 0.90%       | 4.48%  | 3.69%          | 19.62%        |
| Medical Hypotheses                                                | 1.81%     | 4.54%  | 2.49%  | 3.40%  | 3.63%  | 2.49%   | 14.97% | 5.22%  | 13.61% | 0.91% | 1.81%       | 1.13%    | 3.85%        | 0.91%        | 0.91%       | 1.81%  | 0.91%       | 5.67%  | 5.22%          | 18.59%        |
| Nature                                                            | 1.72%     | 0.98%  | 1.47%  | 6.63%  | 1.72%  | 4.42%   | 0.49%  | 0.25%  | 1.97%  | 0.74% | 1.47%       | 0.25%    | 0.25%        | 1.47%        | 0.49%       | 0.49%  | 2.95%       | 0.25%  | 6.88%          | 15.48%        |
| New England Journal Of Medicine                                   | 2.58%     | 1.88%  | 2.35%  | 5.40%  | 2.35%  | 3.99%   | 0.94%  | 0.23%  | 3.52%  | 1.41% | 0.47%       | 0.23%    | 0.47%        | 1.64%        | 1.17%       | 1.88%  | 1.41%       | 0.23%  | 7.04%          | 59.62%        |
| Plos One                                                          | 3.38%     | 4.59%  | 5.39%  | 10.46% | 4.67%  | 6.68%   | 3.30%  | 1.37%  | 7.08%  | 3.06% | 2.49%       | 1.37%    | 1.85%        | 1.61%        | 1.93%       | 5.15%  | 3.54%       | 0.97%  | 10.62%         | 31.86%        |
| Science Of The Total Environment                                  | 4.68%     | 5.15%  | 4.45%  | 25.29% | 2.34%  | 3.28%   | 11.01% | 2.58%  | 8.20%  | 5.15% | 2.11%       | 1.64%    | 1.87%        | 0.47%        | 2.81%       | 8.43%  | 0.70%       | 1.41%  | 7.49%          | 23.89%        |
| Scientific Reports                                                | 3.33%     | 3.33%  | 4.25%  | 15.53% | 4.25%  | 6.84%   | 4.25%  | 1.85%  | 10.91% | 5.73% | 2.96%       | 0.55%    | 1.29%        | 0.55%        | 4.07%       | 4.44%  | 1.66%       | 0.74%  | 10.35%         | 28.47%        |
| Sustainability (Switzerland)                                      | 3.51%     | 2.46%  | 3.51%  | 9.14%  | 1.58%  | 4.04%   | 1.58%  | 0.35%  | 13.71% | 3.87% | 1.23%       | 0.70%    | 2.46%        | 1.23%        | 7.03%       | 17.57% | 0.35%       | 0.70%  | 4.39%          | 9.49%         |
| The BMJ                                                           | 3.35%     | 1.17%  | 2.33%  | 3.64%  | 0.44%  | 0.87%   | 1.75%  |        | 1.17%  | 0.44% | 1.46%       | 0.58%    | 0.29%        | 1.60%        | 0.58%       | 0.73%  | 3.21%       | 0.29%  | 66.76%         | 13.56%        |
| The Lancet                                                        | 5.92%     | 4.08%  | 5.31%  | 11.84% | 4.29%  | 10.00%  | 1.43%  | 0.20%  | 5.51%  | 1.02% | 2.86%       | 0.61%    | 0.82%        | 5.31%        | 0.61%       | 4.49%  | 9.39%       | 0.41%  | 35.92%         | 32.24%        |
