# Supplementary material for: How the scientific community responded to the COVID-19 pandemic: A subject-level time-trend bibliometric analysis
Source: PLoS One. 2021 Sep 30;16(9):e0258064. doi: 10.1371/journal.pone.0258064 (PMC8483337; doi:10.1371/journal.pone.0258064)
Supplement: S2 Table — (PDF) [file pone.0258064.s002.pdf]

**Supplementary Table 2** Groups of medial sub-topics in the health sciences domain

| Groups                                               | Medical Subjects                                                                                                                                                                                                                                                                                                                                                                     |
|------------------------------------------------------|--------------------------------------------------------------------------------------------------------------------------------------------------------------------------------------------------------------------------------------------------------------------------------------------------------------------------------------------------------------------------------------|
| Anesthesiology and Pain Medicine                     | Anesthesiology and Pain Medicine                                                                                                                                                                                                                                                                                                                                                     |
| Basic Sciences                                       | Anatomy<br>Biochemistry<br>Embryology<br>Genetics<br>Histology<br>Microbiology<br>Pharmacology<br>Physiology                                                                                                                                                                                                                                                                         |
| Dermatology                                          | Dermatology                                                                                                                                                                                                                                                                                                                                                                          |
| Emergency Medicine                                   | Emergency Medicine                                                                                                                                                                                                                                                                                                                                                                   |
| Family Medicine                                      | Family Practice                                                                                                                                                                                                                                                                                                                                                                      |
| General Internal Medicine                            | Cardiology and Cardiovascular Medicine<br>Complementary and Alternative Medicine<br>Critical Care and Intensive Care Medicine<br>Endocrinology, Diabetes and Metabolism<br>Gastroenterology<br>Geriatrics and Gerontology<br>Hematology<br>Hepatology<br>Immunology and Allergy<br>Internal Medicine<br>Nephrology<br>Oncology<br>Pulmonary and Respiratory Medicine<br>Rheumatology |
| Infectious Diseases                                  | Infectious Diseases                                                                                                                                                                                                                                                                                                                                                                  |
| Neurology                                            | Neurology                                                                                                                                                                                                                                                                                                                                                                            |
| Obstetrics and Gynecology                            | Obstetrics and Gynecology<br>Reproductive Medicine                                                                                                                                                                                                                                                                                                                                   |
| Ophthalmology                                        | Ophthalmology                                                                                                                                                                                                                                                                                                                                                                        |
| Orthopedics and Sports Medicine                      | Orthopedics and Sports Medicine<br>Rehabilitation                                                                                                                                                                                                                                                                                                                                    |
| Otorhinolaryngology                                  | Otorhinolaryngology                                                                                                                                                                                                                                                                                                                                                                  |
| Pathology and Forensic Medicine                      | Pathology and Forensic Medicine                                                                                                                                                                                                                                                                                                                                                      |
| Pediatrics, Perinatology and Child Health            | Pediatrics, Perinatology and Child Health                                                                                                                                                                                                                                                                                                                                            |
| Psychiatry and Mental Health                         | Psychiatry and Mental Health                                                                                                                                                                                                                                                                                                                                                         |
| Public Health, Environmental and Occupational Health | Epidemiology<br>Health Informatics<br>Health Policy<br>Public Health, Environmental and Occupational Health                                                                                                                                                                                                                                                                          |
| Radiology, Nuclear Medicine and Imaging              | Radiology, Nuclear Medicine and Imaging                                                                                                                                                                                                                                                                                                                                              |
| Surgery                                              | Surgery<br>Transplantation<br>Urology                                                                                                                                                                                                                                                                                                                                                |
